# Supplementary material for: Sensing Capacity in Dysprosium Metal–Organic Frameworks Based on 5-Aminoisophthalic Acid Ligand
Source: MDPI journal article supplement (doi:10.3390/s22093392), 2022-04-28
Supplement: s1 [file s1]

Supporting Information for:

**Sensing Capacity in Dysprosium Metal–Organic Frameworks Based on 5-Aminoisophthalic Acid Ligand**

Javier Cepeda <sup>1</sup>, Isabel Blasco-Pascual <sup>2</sup>, Sara Rojas <sup>3</sup>, Duane Choquesillo-Lazarte <sup>4</sup>, Francisco J. Guerrero-Arroyo <sup>3</sup>, Diego P. Morales <sup>5</sup>, Jose Ángel García <sup>6</sup>, Antonio Rodríguez-Diéguez <sup>3,\*</sup> and Alfonso Salinas-Castillo <sup>2,\*</sup>

1 Department of Applied Chemistry, Faculty of Chemistry, University of the Basque Country (UPV/EHU), 20018 Donostia-San Sebastián, Spain.

2 Department of Analytical Chemistry, Faculty of Science, University of Granada, 18071 Granada, Spain.

3 Department of Inorganic Chemistry, Faculty of Science, University of Granada, 18071 Granada, Spain.

4 Laboratorio de Estudios Cristalográficos, IACT, CSIC-UGR, Av. Las Palmeras nº4, 18100 Granada, Spain.

5 Pervasive Electronics Advanced Research Laboratory (PEARL), Department Electronics and Computer Technology, University of Granada, 18071, Granada, Spain.

6 Departamento de Física Aplicada II, Facultad de Ciencia y Tecnología, Universidad del País Vasco/Euskal Herriko Unibertsitatea (UPV/EHU), 48940 Leioa, Spain.

**Index:**

**S1. PXRD data for compounds 1 and 2.**

**S2. Thermogravimetric measurements.**

### S1. PXRD data for compounds 1 and 2.

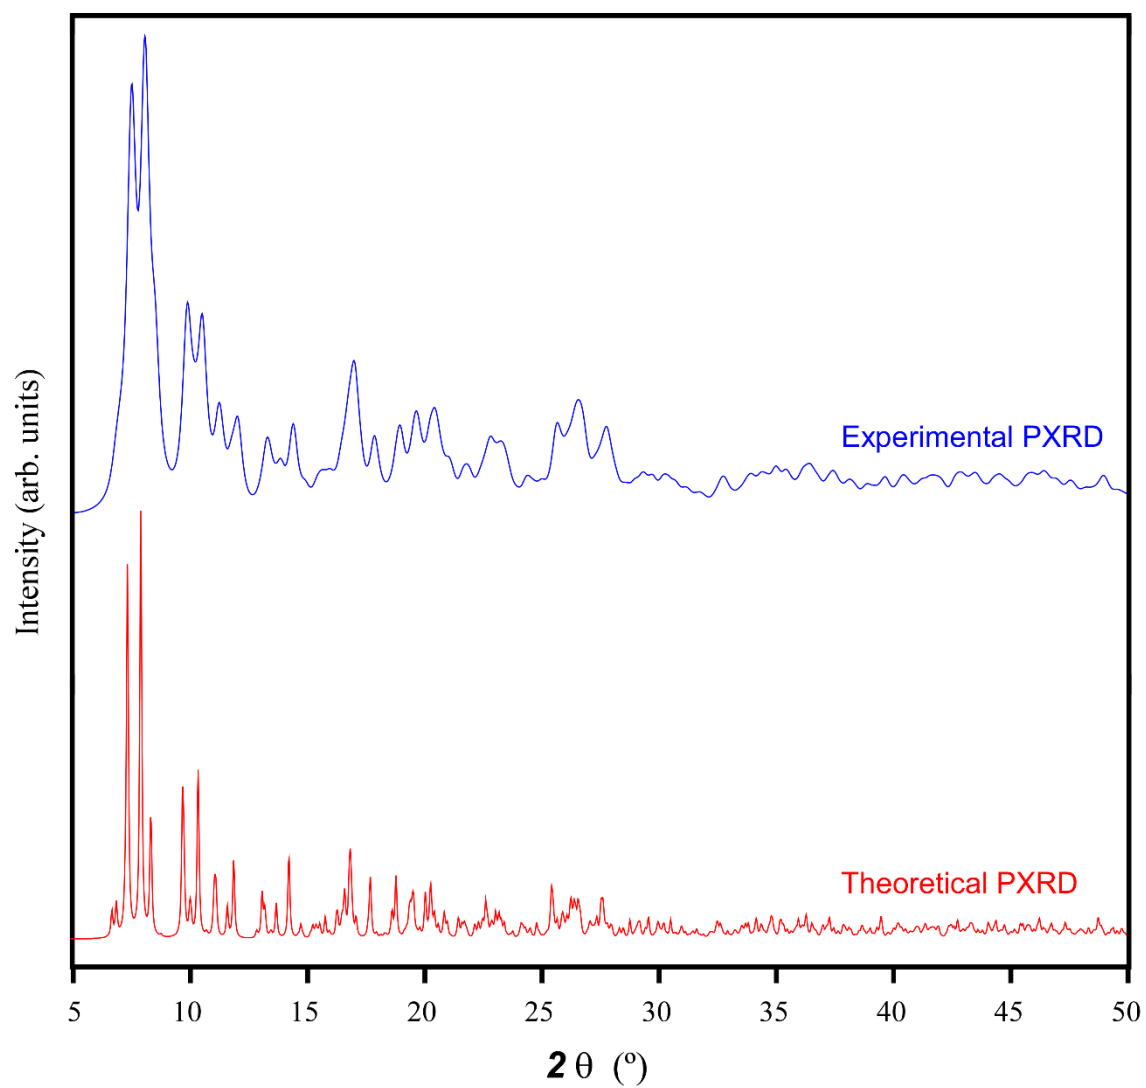

**Figure S1.** Comparison of the PXRD data of compound 1.

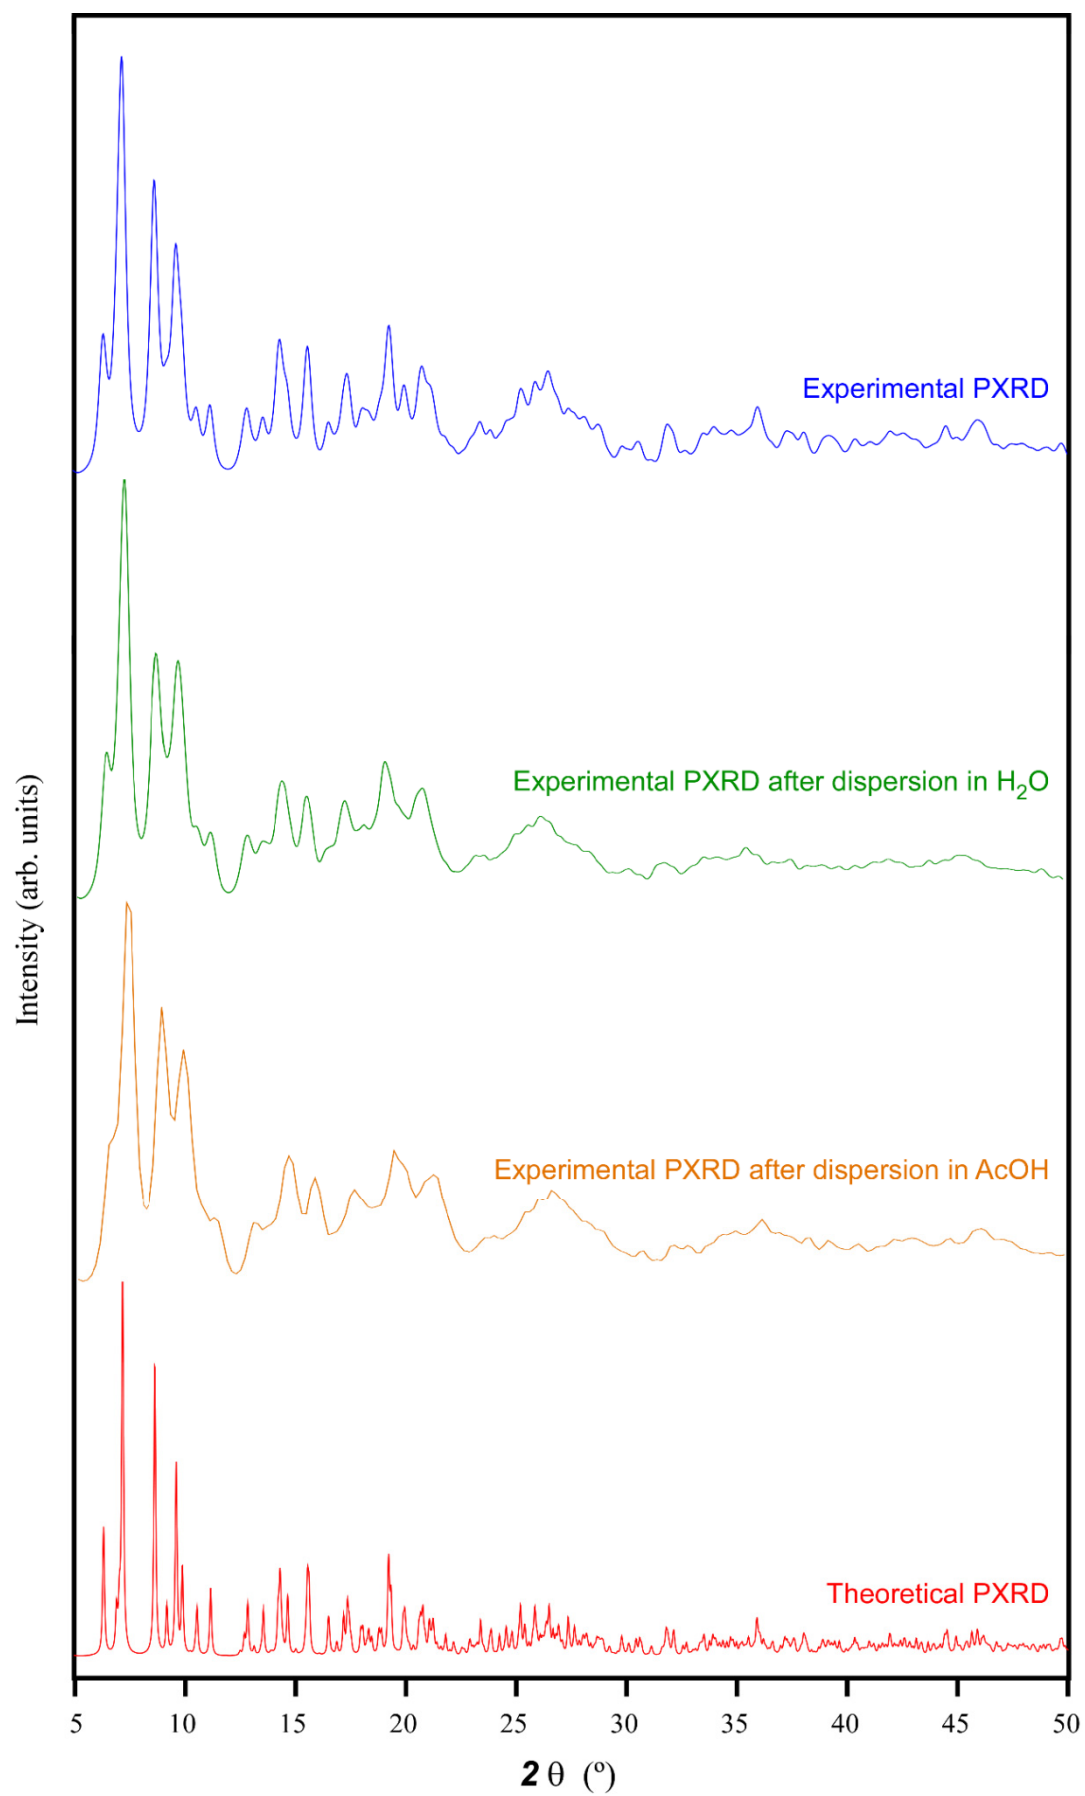

**Figure S2.** Comparison of the PXRD data of compound 2.

## S2. Thermogravimetric measurements.

The thermogravimetric data of compounds **1** and **2** reveal a distinct decomposition behavior that is in agreement with their crystal structure. On the one hand, compound **1** presents a first mass loss, corresponding to the lattice solvent molecules, between 40 and 250 °C. Thereafter, a small plateau appears up to 420 °C, above which the 2D-layered structure starts to decompose, giving rise to  $\text{Dy}_2\text{O}_3$  as the final residue. Despite the fact that the 2D-layered structure retains its integrity (referred to as the mass percentage) between 250 and 420 °C of temperature range, the partially desolvated compound is completely amorphous, meaning that the ordered structure of the MOF is lost upon heating, a fact that precludes its further activity as a gas adsorbent. On the other hand, compound **2** shows two steps corresponding to the loss of the lattice water molecules (in the 30–120 °C range) and to the release of the lattice DMF and coordination water molecules (in the 130–420 °C range). In this case, the temperature at which the structure could be activated (when voids would be empty) is not clear given the absence of a plateau. All efforts to correctly activate the MOF by heating it gave rise to amorphous solids; therefore, no further analysis of its porosity was performed.

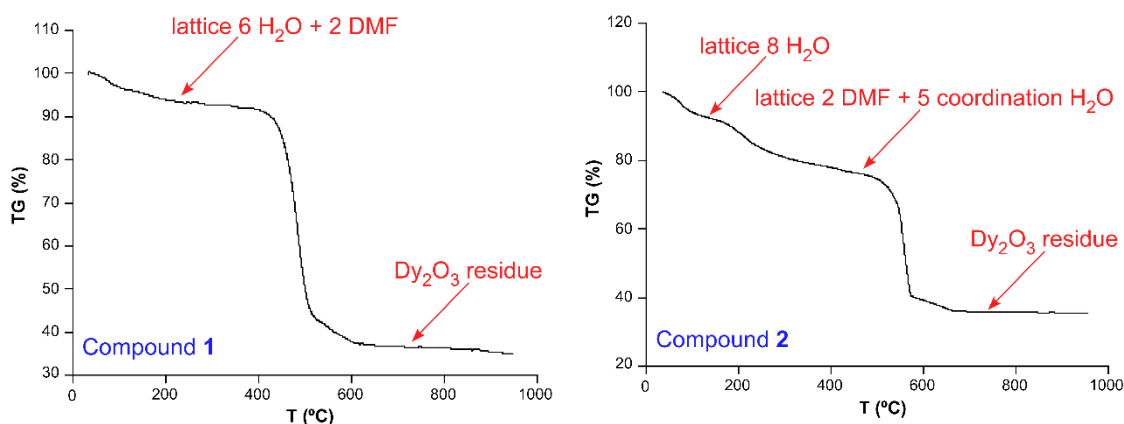

**Figure S3.** Thermogravimetric profiles of compounds **1** and **2**.

**View along the a, b and c axes.**

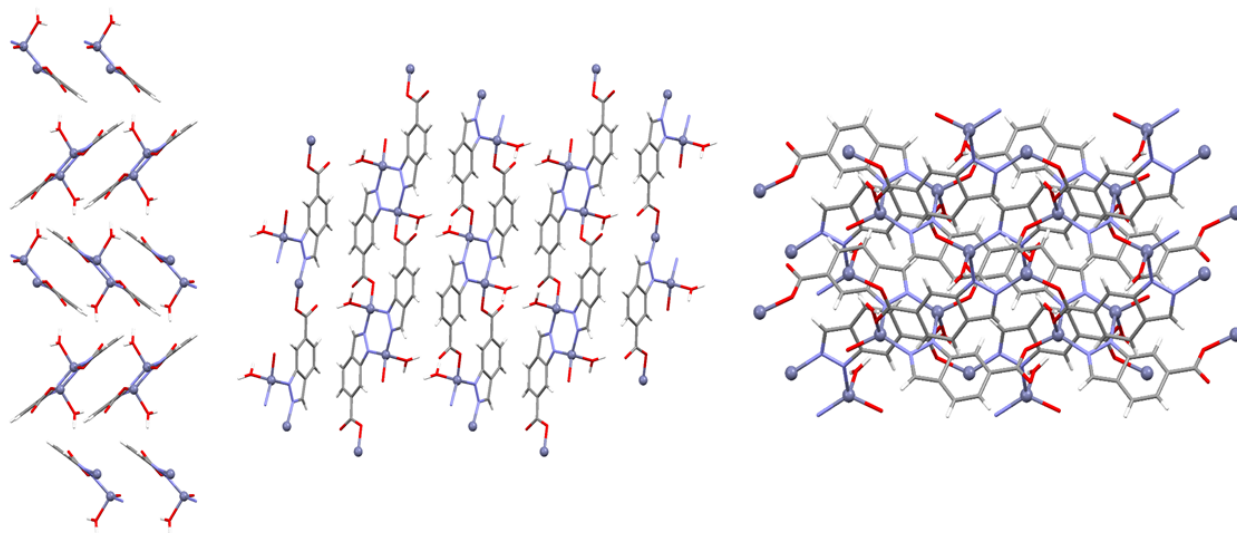

**Compound 1**

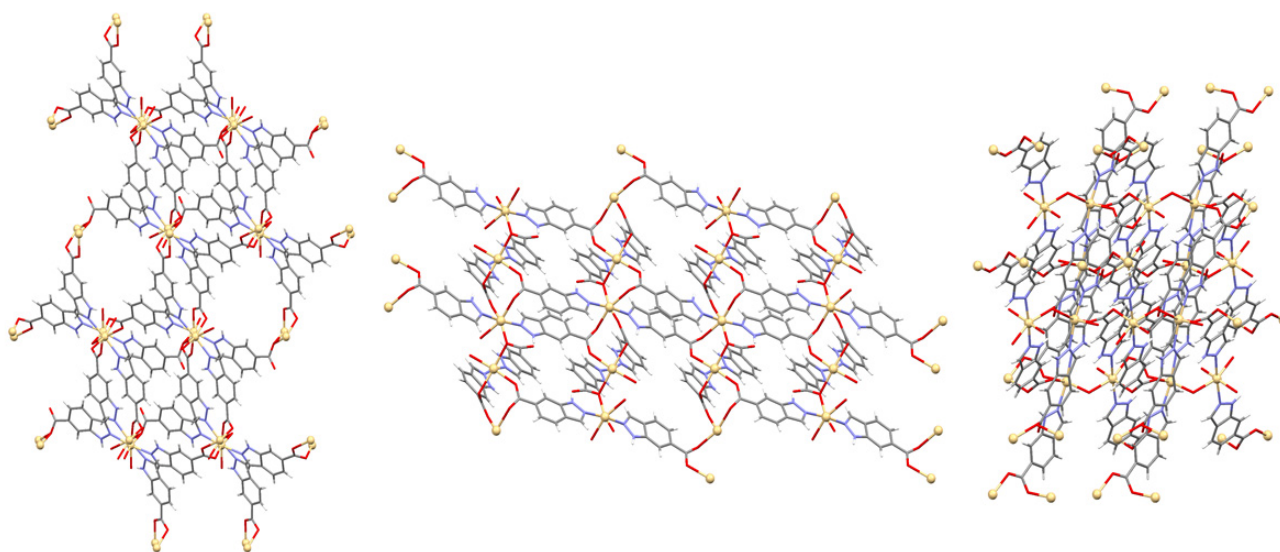

**Compound 2**

**Figure S4.** View along a (left), b (middle) and c (right) axis of compound 1 (above) and compound 2 (below).

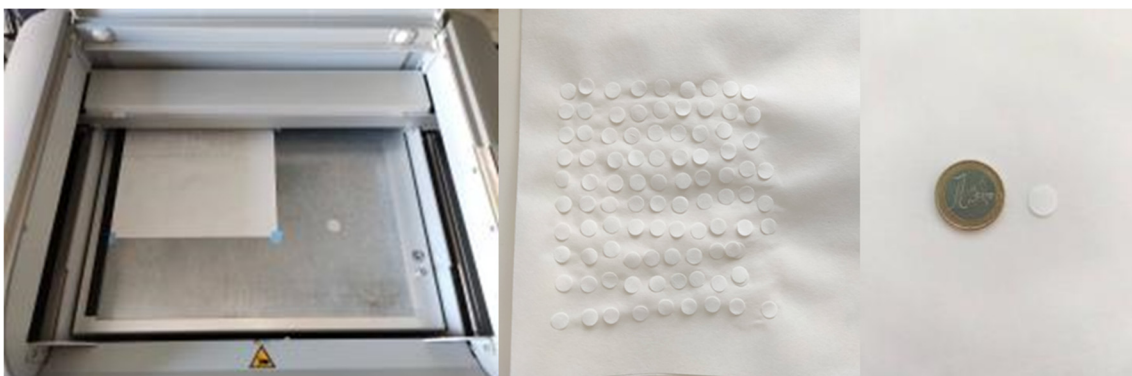

**Figure S5.** Paper analytical device development

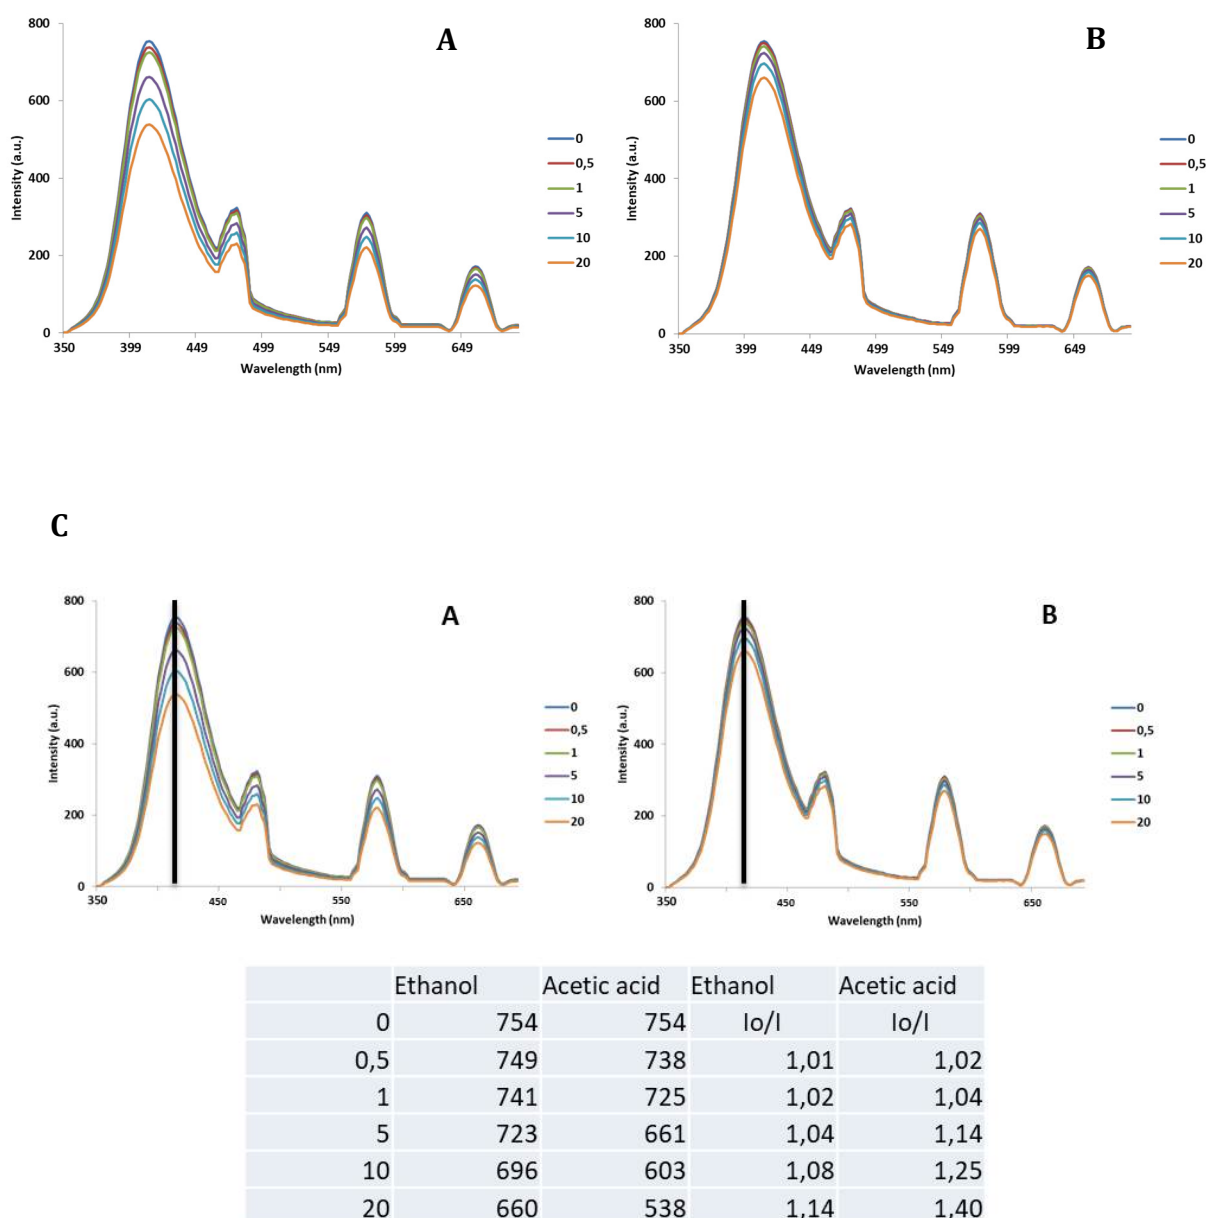

**Figure S6.** Spectrum emission using the test paper, with compound **2** for acetic acid (A) and ethanol (B). Conditions for fluorescence excitation at 325 nm, with intensity based (Io/I) at a maximum peak emission of 410 nm (C).
